# Supplementary material
Source: HighWire-hosted journal article supplement (https://erj.ersjournals.com/content/55/4/1901340)
Supplement: inline-supplementary-material-2 [file inline-supplementary-material-2.pdf]

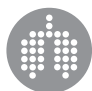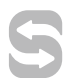

SHAREABLE PDF

# Crucial role for lung iron level and regulation in the pathogenesis and severity of asthma

Md. Khadem Ali<sup>1,2</sup>, Richard Y. Kim<sup>2,3</sup>, Alexandra C. Brown<sup>2</sup>, Jemma R. Mayall<sup>2</sup>, Rafia Karim<sup>2</sup>, James W. Pinkerton<sup>2,4</sup>, Gang Liu<sup>2,3</sup>, Kristy L. Martin<sup>5</sup>, Malcolm R. Starkey<sup>2,6</sup>, Amber L. Pillar<sup>2</sup>, Chantal Donovan<sup>2,3</sup>, Prabuddha S. Pathinayake<sup>7</sup>, Olivia R. Carroll<sup>2</sup>, Debbie Trinder<sup>8</sup>, Hock L. Tay<sup>2</sup>, Yusef E. Badi<sup>9</sup>, Nazanin Z. Kermani<sup>10</sup>, Yi-Ke Guo<sup>10</sup>, Ritambhara Aryal<sup>5</sup>, Sharon Mumby<sup>9</sup>, Stelios Pavlidis<sup>9</sup>, Ian M. Adcock<sup>9</sup>, Jessica Weaver<sup>10</sup>, Dikaia Xenaki<sup>11</sup>, Brian G. Oliver<sup>11</sup>, Elizabeth G. Holliday<sup>12,13</sup>, Paul S. Foster<sup>2</sup>, Peter A. Wark<sup>10,14</sup>, Daniel M. Johnstone<sup>15</sup>, Elizabeth A. Milward<sup>5</sup>, Philip M. Hansbro<sup>2,3,16</sup> and Jay C. Horvat<sup>2,16</sup>

**Affiliations:** <sup>1</sup>Division of Pulmonary and Critical Care Medicine, Stanford University, Stanford, CA, USA. <sup>2</sup>Priority Research Centre for Healthy Lungs, Hunter Medical Research Institute and School of Biomedical Sciences and Pharmacy, University of Newcastle, Newcastle, Australia. <sup>3</sup>Centre for Inflammation, Centenary Institute and University of Technology Sydney, Sydney, Australia. <sup>4</sup>Respiratory Pharmacology and Toxicology Group, National Heart and Lung Institute, Imperial College London, London, UK. <sup>5</sup>School of Biomedical Sciences and Pharmacy, University of Newcastle, Newcastle, Australia. <sup>6</sup>Dept of Immunology and Pathology, Central Clinical School, Monash University, Melbourne, Australia. <sup>7</sup>Priority Research Centre for Healthy Lungs, Hunter Medical Research Institute and School of Medicine and Public Health, University of Newcastle, Newcastle, Australia. <sup>8</sup>Medical School, Harry Perkins Medical Research Institute, University of Western Australia, Fiona Stanley Hospital, Perth, Australia. <sup>9</sup>Airway Disease Section, National Heart and Lung Institute, Imperial College London, London, UK. <sup>10</sup>Data Science Institute, Dept of Computing, Imperial College London, London, UK. <sup>11</sup>Woolcock Institute of Medical Research, University of Sydney and School of Life Sciences, University of Technology Sydney, Sydney, Australia. <sup>12</sup>Hunter Medical Research Institute, New Lambton, Australia. <sup>13</sup>School of Medicine and Public Health, University of Newcastle, Callaghan, Australia. <sup>14</sup>Dept of Respiratory and Sleep Medicine, John Hunter Hospital, Newcastle, Australia. <sup>15</sup>Discipline of Physiology and Bosch Institute, University of Sydney, Sydney, Australia. <sup>16</sup>These authors contributed equally.

**Correspondence:** Jay C. Horvat, School of Biomedical Sciences and Pharmacy, Faculty of Health and Medicine, The University of Newcastle, University Drive, Callaghan, New South Wales, 2308, Australia. E-mail: jay.horvat@newcastle.edu.au

@ERSpublications

**The relationship between iron and the pathogenesis of asthma remains unclear. Here it is shown for the first time that altered iron responses are a key feature of clinical and experimental asthma and may play important roles in disease.** <http://bit.ly/36JKajt>

**Cite this article as:** Ali MK, Kim RY, Brown AC, *et al.* Crucial role for lung iron level and regulation in the pathogenesis and severity of asthma. *Eur Respir J* 2020; 55: 1901340 [<https://doi.org/10.1183/13993003.01340-2019>].

This single-page version can be shared freely online.

**ABSTRACT** Accumulating evidence highlights links between iron regulation and respiratory disease. Here, we assessed the relationship between iron levels and regulatory responses in clinical and experimental asthma.

We show that cell-free iron levels are reduced in the bronchoalveolar lavage (BAL) supernatant of severe or mild-moderate asthma patients and correlate with lower forced expiratory volume in 1 s (FEV<sub>1</sub>).

Conversely, iron-loaded cell numbers were increased in BAL in these patients and with lower FEV<sub>1</sub>/forced vital capacity (FVC) ratio. The airway tissue expression of the iron sequestration molecules divalent metal transporter 1 (*DMT1*) and transferrin receptor 1 (*TFR1*) are increased in asthma, with *TFR1* expression correlating with reduced lung function and increased Type-2 (T2) inflammatory responses in the airways. Furthermore, pulmonary iron levels are increased in a house dust mite (HDM)-induced model of experimental asthma in association with augmented *Tfr1* expression in airway tissue, similar to human disease. We show that macrophages are the predominant source of increased Tfr1 and Tfr1<sup>+</sup> macrophages have increased *Il13* expression. We also show that increased iron levels induce increased pro-inflammatory cytokine and/or extracellular matrix (ECM) responses in human airway smooth muscle (ASM) cells and fibroblasts *ex vivo* and induce key features of asthma *in vivo*, including airway hyper-responsiveness (AHR) and fibrosis, and T2 inflammatory responses.

Together these complementary clinical and experimental data highlight the importance of altered pulmonary iron levels and regulation in asthma, and the need for a greater focus on the role and potential therapeutic targeting of iron in the pathogenesis and severity of disease.
